# Supplementary material for: An evaluation of processing methods for HumanMethylation450 BeadChip data
Source: PubMed Central journal article supplement (PMC4918139; doi:10.1186/s12864-016-2819-7), 2016-06-22
Supplement: 12864_2016_2819_MOESM3_ESM.pdf [file 12864_2016_2819_MOESM3_ESM.pdf]

# MDS plot for COAD

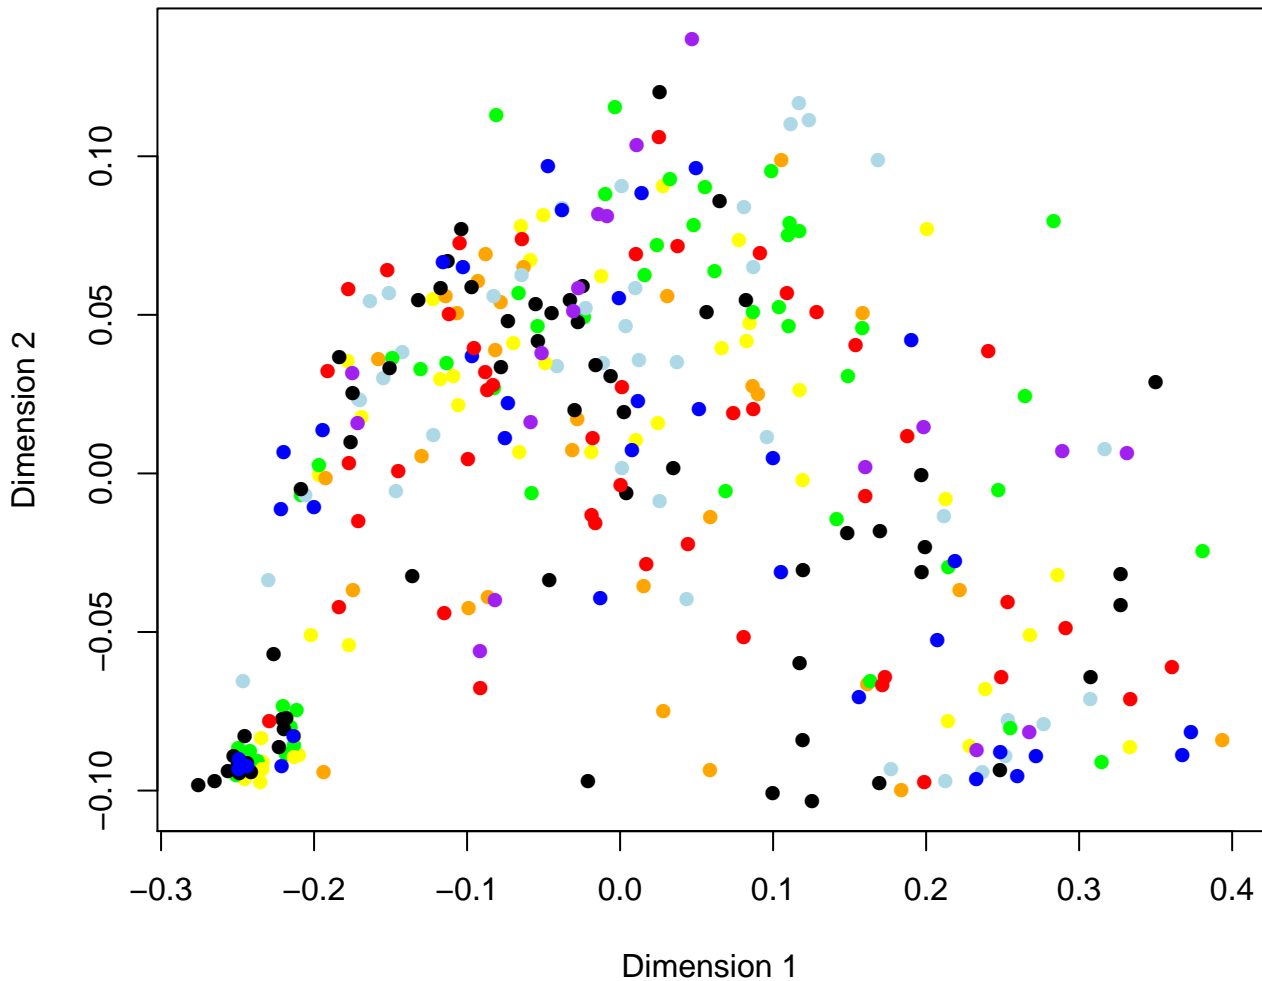

- 1721
- 1772
- 1837
- A27A
- 1407
- 1651
- 1926
- 1551,A153,A16X,A280
