# Supplementary material for: An evaluation of processing methods for HumanMethylation450 BeadChip data
Source: PubMed Central journal article supplement (PMC4918139; doi:10.1186/s12864-016-2819-7), 2016-06-22

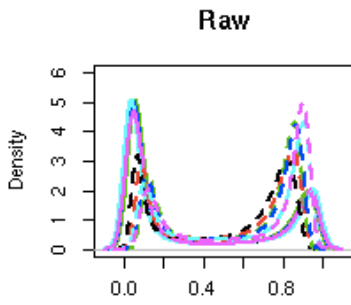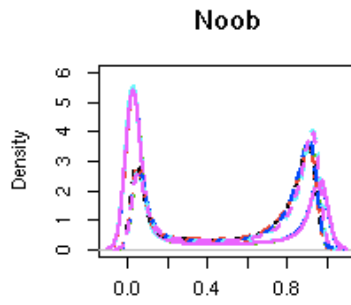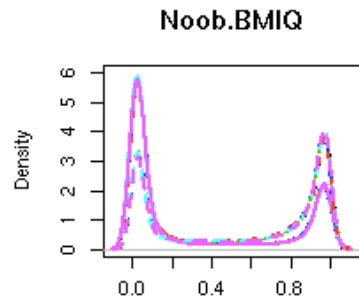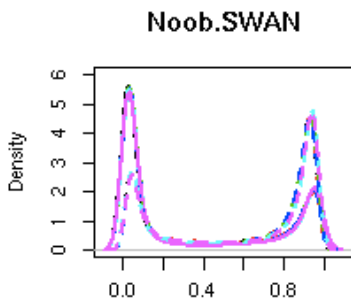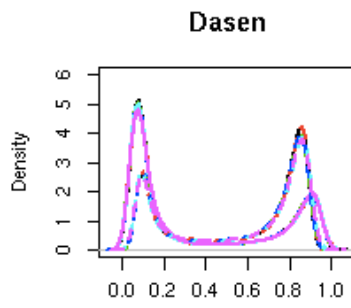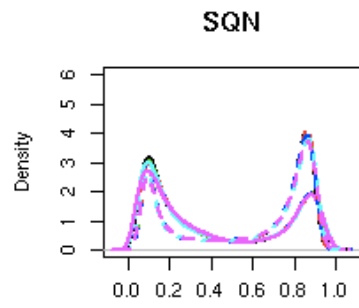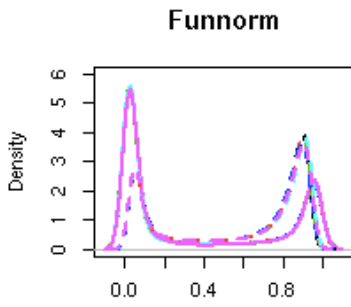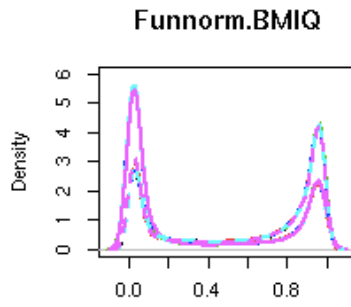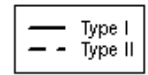

Supplement: 12864_2016_2819_MOESM4_ESM.pdf [file 12864_2016_2819_MOESM4_ESM.pdf]
